# Supplementary material for: Comparative analysis of cyanobacteria species reveals a novel guanidine-degrading enzyme that controls genomic stability of ethylene-producing strains
Source: Research Square preprint supplement (doi:10.21203/rs.3.rs-197190/v1), 2021-03-29
Supplement: Supplementary file 1 [file 5293ba06cb02552f22f69b54.xlsx]

## Sheet: Sheet1
Taxonomy of species	abbrev.	Seq.accession	DNA strand	5' at	3' at	genes (conserved domains) under the control of guanidine riboswitches
environmental samples	env-1	JCVI_SCAF_1096627208816	-	836	736	Arginase	(pfam00491)
Bacteria Firmicutes Bacillales Alicyclobacillaceae Bacillus tusciae DSM 2912	Btu-1-1	NC_014098.1	-	2032540	2032430	Arginase	(pfam00491)
Bacteria Cyanobacteria Chroococcales Synechococcus sp. WH 5701	Ssp-3-1	NZ_CH724160.1	+	628091	628212	Arginase	(pfam00491)	HypA	(pfam01155)	hypB	(TIGR00073)
Bacteria Cyanobacteria Oscillatoriophycideae Oscillatoriales Geitlerinema sp. PCC 7407	Gsp-4-1	NC_019703.1	-	2860848	2860718	Arginase	(pfam00491)	Arginase	(pfam00491)	HypA	(pfam01155)hypA	(TIGR00100)
Bacteria Cyanobacteria Oscillatoriophycideae Chroococcales Synechocystis sp. PCC 7509	Ssp-11-1	NZ_ALVU01000157.1	-	24071	23946	Arginase	(pfam00491)	hypA	(TIGR00100)	hypB	(TIGR00073)
environmental samples	env-23	2013519757	-	3387	3260	Arginase	(pfam00491)
Bacteria Proteobacteria Alphaproteobacteria Rhizobiales Phyllobacteriaceae Hoe ea phototrophica DFL-43	Hph-1-1	NZ_DS544889.1	+	2338458	2338570	ABC_peri_uca	(TIGR03427)	TM_PBP2	(cd06261)	ABC_NrtD_SsuB_transporters	(cd03293)	Arginase	(pfam00491)
Bacteria Cyanobacteria Oscillatoriophycideae Chroococcales Dactylococcopsis salina PCC 8305	Dsa-1-1	NC 019780.1	-	3663911	3663774	Arginase	(pfam00491)		HypA	(pfam01155)
Bacteria Proteobacteria Alphaproteobacteria Rhodobacterales Rhodobacteraceae Sagittula stellata E-37	Sst-1-1	NZ_AAYA01000003.1	+	309765	309872	ABC_peri_uca	(TIGR03427)	TM_PBP2	(cd06261)	ABC_NrtD_SsuB_transporters	(cd03293)	Arginase	(pfam00491)
Bacteria Proteobacteria Alphaproteobacteria Rhodobacterales bacterium HTCC2654	Rba-1-1	NZ_CH902578.1	-	1602858	1602749	ABC_peri_uca	(TIGR03427)	TM_PBP2	(cd06261)	ABC_NrtD_SsuB_transporters	(cd03293)	Arginase	(pfam00491)	DUF2236	(pfam09995)
Bacteria Proteobacteria Alphaproteobacteria Rhodobacterales Rhodobacteraceae Loktanella cinnabarina LL-001	Lci-1-1	NZ_BATB01000019.1	+	20174	20277	ABC_peri_uca	(TIGR03427)	TM_PBP2	(cd06261)	ABC_NrtD_SsuB_transporters	(cd03293)	Arginase	(pfam00491)
Bacteria Cyanobacteria Oscillatoriophycideae Chroococcales Synechococcus sp. PCC 7336	Ssp-9-1	NZ_CM001776.1	+	1949234	1949338	Arginase	(pfam00491)	HypA	(pfam01155)	hypB	(TIGR00073)
Bacteria Cyanobacteria Chroococcales Synechococcus sp. CB0205	Ssp-1-1	NZ_ADXM01000056.1	+	14396	14494	Arginase	(pfam00491)	HypA	(pfam01155)	HypA	(pfam01155)
Bacteria Cyanobacteria Oscillatoriales Arthrospira sp. PCC 8005	Asp-3-1	NZ_CAFN01000002.1	-	9995	9847	Arginase	(pfam00491)	hypA	(TIGR00100)	hypB	(TIGR00073)
Bacteria Cyanobacteria Oscillatoriophycideae Oscillatoriales Oscillatoria acuminata PCC 6304	Oac-1-1	NC_019693.1	-	57118	56984	Arginase	(pfam00491)	hypA	(TIGR00100)		hypB	(TIGR00073)
Bacteria Cyanobacteria Oscillatoriophycideae Chroococcales Cyanobium gracile PCC 6307	Cgr-1-1	NC_019675.1	+	985788	985932	Arginase	(pfam00491)	HypA	(pfam01155)	hypB	(TIGR00073)
Bacteria Cyanobacteria Chroococcales Cyanobium sp. PCC 7001	Csp-2-1	NZ_DS990556.1	-	259768	259647	Arginase	(pfam00491)	HypA	(pfam01155)	hypB	(TIGR00073)	hypB	(TIGR00073)
Bacteria Proteobacteria Alphaproteobacteria Rhizobiales Rhizobiaceae Rhizobium/Agrobacterium group Rhizobium sp. NGR234	Rsp-6-1	NC_12586.1	-	394021	393914	ABC_peri_uca	(TIGR03427)	TM_PBP2	(cd06261)	ABC_NrtD_SsuB_transporters	(cd03293)	Arginase	(pfam00491)	hypo	HupE	UreJ	(pfam04955)
Bacteria Proteobacteria Alphaproteobacteria Rhizobiales Rhizobiaceae Sinorhizobium/Ensifer group Sinorhizobium fredii USDA 257	Sfr-1-1	NC_018000.1	-	2877619	2877512	ABC_peri_uca	(TIGR03427)	TM_PBP2	(cd06261)	ABC_NrtD_SsuB_transporters	(cd03293)	Arginase	(pfam00491)	hypo	HupE	UreJ	(pfam04955)
environmental samples	env-71	SL_1KL_011_SED_10003896	-	2271	2157	Arginase	(pfam00491)	hypA	(TIGR00100)	hypB	(TIGR00073)
environmental samples	env-72	SL_5KL_010_SED_10001714	-	982	868	Arginase	(pfam00491)
environmental samples	env-75	SL_1KL_011_SED_10008350	+	4825	4939	Arginase	(pfam00491)
Bacteria Cyanobacteria Pleurocapsales Pleurocapsa sp. PCC 7319	Psp-2-1	NZ_KB235922.1	+	599225	599367	Arginase	(pfam00491)
Bacteria Cyanobacteria Chroococcales Synechocystis sp. PCC 6803	Ssp-5-1	NC_017277.1	-	801401	801280	Arginase	(pfam00491)	hypA	(TIGR00100)	hypB	(cd00882)	SsuA_fam	(TIGR01728)	sll1081	nrtD
Bacteria Cyanobacteria Chroococcales Synechocystis sp. PCC 6803	Ssp-5-3	NC_020286.1	-	801056	800935	Arginase	(pfam00491)	hypA	(TIGR00100)	hypB	(cd00882)	SsuA_fam	(TIGR01728)	sll1082	nrtD
Bacteria Cyanobacteria Chroococcales Synechocystis sp. PCC 6803	Ssp-5-2	NC_000911.1	-	801401	801280	Arginase	(pfam00491)	hypA	(TIGR00100)	hypB	(cd00882)	SsuA_fam	(TIGR01728)	sll1083	nrtD
Bacteria Cyanobacteria Chroococcales Synechocystis sp. PCC 6803 substr. GT-I	Ssp-6-1	NC_017038.1	-	801503	801382	Arginase	(pfam00491)	hypA	(TIGR00100)	hypB	(cd00882)	SsuA_fam	(TIGR01728)	sll1084	nrtD
Bacteria Cyanobacteria Chroococcales Synechocystis sp. PCC 6803 substr. PCC-N	Ssp-7-1	NC_017052.1	-	801644	801523	Arginase	(pfam00491)	hypA	(TIGR00100)	hypB	(cd00882)	SsuA_fam	(TIGR01728)	sll1085	nrtD
Bacteria Cyanobacteria Chroococcales Synechocystis sp. PCC 6803 substr. PCC-P	Ssp-8-1	NC_17039.1	-	801656	801535	Arginase	(pfam00491)	hypA	(TIGR00100)	hypB	(cd00882)	SsuA_fam	(TIGR01728)	sll1086	nrtD
environmental samples	env-82	3300000053_067336	+	242	349	SsuA_fam	(TIGR01728)	TM_PBP2	(cd06261)	ABC_NrtD_SsuB_transporters	(cd03293)	Arginase	(pfam00491)	CbiM	(pfam01891)	PRK06287	(PRK06287)
Bacteria Cyanobacteria Oscillatoriophycideae Oscillatoriales cyanobacterium JSC-12	Ocy-1-1	NZ_CM001633.1	+	1425799	1425911	Arginase	(pfam00491)	HypA	(pfam01155)	hypB	(TIGR00073)
Bacteria Proteobacteria Alphaproteobacteria Rhizobiales Xanthobacteraceae unclassi ed Xanthobacteraceae Xanthobacteraceae bacterium 501b	Xba-1-1	NZ_KB899087.1	+	3294888	3295003	Arginase	(pfam00491)
Bacteria Proteobacteria Alphaproteobacteria Rhizobiales Xanthobacteraceae Starkeya novella DSM 506	Sno-1-1	NC_014217.1	-	87994	87894	Arginase	(pfam00491)
Bacteria Actinobacteria Actinobacteridae Actinomycetales Micromonosporineae Micromonosporaceae Actinoplanes friuliensis DSM 7358	Afr-1-1	NC_022657.1	-	7558152	7558053	Arginase	(pfam00491)	Arginase	(pfam00491)	SsuA	fam	(TIGR01728)
Bacteria Cyanobacteria Stigonematales Chlorogloeopsis fritschii PCC 6912	Cfr-1-1	NZ_AJLN01000037.1	-	13655	13543	Arginase	(pfam00491)	hypA	(TIGR00100)	hypB	(TIGR00073)
Bacteria Cyanobacteria Stigonematales Fischerella muscicola PCC 7414	Fmu-1-1	NZ_AJLK01000027.1	-	5793	5683	Arginase	(pfam00491)
Bacteria Cyanobacteria Stigonematales Fischerella sp. JSC-11	Fsp-2-1	NZ_AGIZ01000008.1	-	1762	1652	Arginase	(pfam00491)
Bacteria Cyanobacteria Stigonematales Fischerella thermalis PCC 7521	Fth-1-1	NZ_AJLL01000013.1	+	17034	17144	Arginase	(pfam00491)
Bacteria Cyanobacteria Stigonematales Fischerella muscicola SAG 1427-1 = PCC 73103	Fmu-2-1	NZ_AJLJ01000064.1	+	57356	57468	Arginase	(pfam00491)
Bacteria Cyanobacteria cyanobacterium PCC 7702	cPC-1-1	NZ_KB235926.1	-	341731	341618	Arginase	(pfam00491)	HypA	(pfam01155)	Ras	like	GTPase	(cd00882)
Bacteria Cyanobacteria Pleurocapsales Chroococcidiopsis thermalis PCC 7203	Cth-1-1	NC_019695.1	+	1896963	1897120	Arginase	(pfam00491)
environmental samples	env-303	JCVI_SCAF_1096628382219	-	852	757	Arginase	(pfam00491)
Bacteria Cyanobacteria Chroococcales Synechococcus sp. WH 8102	Ssp-4-1	NC 005070.1	+	1383854	1383952	Arginase	(pfam00491)	HypA	(pfam01155)
environmental samples	env-304	JCVI_SCAF_1096627201552	+	5869	5967	Arginase	(pfam00491)
environmental samples	env-306	JCVI_SCAF_1096628067080	-	1528	1430	Arginase	(pfam00491)
environmental samples	env-309	JCVI_SCAF_1096627962308	+	433	533	Arginase	(pfam00491)
environmental samples	env-310	JCVI_SCAF_1096627059263	+	391	491	Arginase	(pfam00491)	HypA	(pfam01155)
Bacteria Cyanobacteria Chroococcales Synechococcus sp. CC9605	Ssp-2-1	NC_007516.1	-	1021660	1021560	Arginase	(pfam00491)	HypA	(pfam01155)	hypB	(TIGR00073)
environmental samples	env-313	JCVI_SCAF_1096627158018	+	528	628	Arginase	(pfam00491)
Bacteria Proteobacteria Alphaproteobacteria Rhizobiales Phyllobacteriaceae Mesorhizobium sp. LSJC280B00	Msp-5-1	NZ_AYVL01000027.1	-	59321	59206	ABC_peri_uca	(TIGR03427)	TauC	(COG0600)	ABC_NrtD_SsuB_transporters	(cd03293)	Arginase	(pfam00491)
Bacteria Proteobacteria Alphaproteobacteria Rhizobiales Phyllobacteriaceae Mesorhizobium amorphae CCNWGS0123	Mam-1-1	NZ_AGSN01000157.1	-	7758	7643	ABC_peri_uca	(TIGR03427)	TM_PBP2	(cd06261)	ABC_NrtD_SsuB_transporters	(cd03293)	Arginase	(pfam00491)	hypo	HupE	UreJ	(pfam04955)
Bacteria Proteobacteria Alphaproteobacteria Rhizobiales Phyllobacteriaceae Mesorhizobium alhagi CCNWXJ12-2	Mal-1-1	NZ_AHAM01000344.1	-	5571	5457	ABC_peri_uca	(TIGR03427)	TauC	(COG0600)	ABC_NrtD_SsuB_transporters	(cd03293)	Arginase	(pfam00491)
environmental samples	env-350	JGI1357J11328_10004548	-	4616	4505	TM_PBP2	(cd06261)	ABC_peri_uca	(TIGR03427)	ABC_NrtD_SsuB_transporters	(cd03293)	Arginase	(pfam00491)
environmental samples	env-351	JGI1356J14229_10006404	+	3811	3922	ABC_peri_uca	(TIGR03427)	TM_PBP2	(cd06261)
Bacteria Cyanobacteria Oscillatoriophycideae Chroococcales Halothece cluster Halothece sp. PCC 7418	Hsp-1-1	NC_019779.1	-	2128785	2128676	Arginase	(pfam00491)	hypA	(TIGR00100)	hypB	(TIGR00073)
Bacteria Proteobacteria Alphaproteobacteria Rhizobiales Bradyrhizobiaceae Bradyrhizobium sp. STM 3843	Bsp-26-1	NZ_CAFK01000283.1	+	19876	19982	ABC_peri_uca	(TIGR03427)	TM_PBP2	(cd06261)	ABC_NrtD_SsuB_transporters	(cd03293)	Arginase	(pfam00491)
Bacteria Cyanobacteria Oscillatoriophycideae Chroococcales Cyanobacterium stanieri PCC 7202	Cst-1-1	NC_019778.1	-	1401039	1400903	Arginase	(pfam00491)	HypA	(pfam01155)	hypB	(TIGR00073)
environmental samples	env-798	SL_9KL_010_SED_10083386	-	992	897	Arginase	(pfam00491)
Bacteria Cyanobacteria Oscillatoriophycideae Chroococcales Cyanobacterium aponinum PCC 10605	Cap-1-1	NC_019776.1	-	3816086	3815958	Arginase	(pfam00491)	hypA	(TIGR00100)
environmental samples	env-799	SL_9KL_010_SED_10003669	-	3897	3788	Arginase	(pfam00491)	hypA	(TIGR00100)	hypB	(TIGR00073)
Bacteria Cyanobacteria Pleurocapsales Stanieria cyanosphaera PCC 7437	Scy-1-1	NC_019748.1	-	1114454	1114310	Arginase	(pfam00491)
Bacteria Cyanobacteria Nostocales Nostocaceae Cylindrospermopsis raciborskii CS-505	Cra-1-1	NZ_ACYA01000047.1	-	176949	176831	Arginase	(pfam00491)	hypA	(TIGR00100)	hypB	(TIGR00073)
Bacteria Cyanobacteria Oscillatoriophycideae Chroococcales Microcystis aeruginosa PCC 9807	Mae-7-1	NZ_HE973364.1	+	26691	26824	hypo	Arginase	(pfam00491)	hypA	(TIGR00100)	hypB	(TIGR00073)
Bacteria Cyanobacteria Oscillatoriophycideae Chroococcales Microcystis aeruginosa DIANCHI905	Mae-2-1	NZ_AOCI01000182.1	-	4576	4443	Arginase	(pfam00491)	hypA	(TIGR00100)	hypB	(TIGR00073)
Bacteria Cyanobacteria Oscillatoriophycideae Chroococcales Microcystis aeruginosa PCC 9432	Mae-4-1	NZ_HE972589.1	+	67716	67850	Arginase	(pfam00491)
Bacteria Cyanobacteria Oscillatoriophycideae Chroococcales Microcystis aeruginosa PCC 9809	Mae-9-1	NZ_HE973766.1	+	26033	26167	Arginase	(pfam00491)	hypA	(TIGR00100)	hypB	(TIGR00073)
Bacteria Cyanobacteria Oscillatoriophycideae Chroococcales Microcystis aeruginosa SPC777	Mae-10-1	NZ_ASZQ01000152.1	-	21577	21443	Arginase	(pfam00491)
Bacteria Cyanobacteria Oscillatoriophycideae Chroococcales Microcystis aeruginosa PCC 7941	Mae-3-1	NZ_HE973167.1	-	194353	194219	Arginase	(pfam00491)	hypA	(TIGR00100)	hypB	(TIGR00073)
Bacteria Cyanobacteria Chroococcales Microcystis aeruginosa NIES-843	Mae-1-1	NC_010296.1	+	1688369	1688503	Arginase	(pfam00491)	hypo	hypA	(TIGR00100)	hypB	(TIGR00073)
Bacteria Cyanobacteria Oscillatoriophycideae Chroococcales Microcystis aeruginosa PCC 9806	Mae-6-1	NZ_HE973252.1	-	22776	22642	Arginase	(pfam00491)
Bacteria Cyanobacteria Oscillatoriophycideae Chroococcales Microcystis aeruginosa PCC 9717	Mae-5-1	NZ_HE972725.1	+	11309	11443	Arginase	(pfam00491)	hypA	(TIGR00100)
Bacteria Cyanobacteria Pleurocapsales Xenococcus sp. PCC 7305	Xsp-1-1	NZ_ALVZ01000176.1	+	32125	32266	Arginase	(pfam00491)
environmental samples	env-802	ElkS_mat_CD2A_1005238	+	1831	1973	hypo	hypo	Arginase	(pfam00491)
Bacteria Cyanobacteria Chroococcales Cyanothece sp. PCC 7822	Csp-4-1	NC_014501.1	+	2260736	2260866	Arginase	(pfam00491)	hypA	(TIGR00100)	hypB	(TIGR00073)
Bacteria Cyanobacteria Oscillatoriophycideae Chroococcales Gloeocapsa sp. PCC 73106	Gsp-1-1	NZ_ALVY01000224.1	+	65801	65894	Arginase	(pfam00491)	HypA	(pfam01155)	hypB	(TIGR00073)
Bacteria Cyanobacteria Oscillatoriales Microcoleus chthonoplastes PCC 7420	Mch-1-1	NZ_DS989861.1	-	123884	123742	Arginase	(pfam00491)	HypA	(pfam01155)	hypB	(TIGR00073)	hypB	(TIGR00073)
ykkc-variant
Bacteria Cyanobacteria Chroococcales Synechococcus sp. RCC307	Ssp-3-1	NC_009482.1	-	2165475	2165375	Arginase	(pfam00491)	HypA	(pfam01155)	hypB	(TIGR00073)	SsuA_fam	(TIGR01728)	TauC	(COG0600)	ABC_NrtD_SsuB_transporters	(cd03293)	Rieske_RO_Alpha N	(cd03469)	RHO_alpha_C	(cd00680)
Bacteria Dictyoglomi Dictyoglomales Dictyoglomaceae Dictyoglomus turgidum DSM 6724	Dtu-1-1	NC_011661.1	-	1438134	1438047	Adenylsuccinate lyase 1	(cd01360)	PurS	(pfam02700)	GATase1_FGAR_AT	(cd01740)	PurL_repeat1	(cd02203)	PurL_repeat2	(cd02204)	GPATase N	(cd00715)	PurM	(cd02196)	PurN	(COG0299)	PurD	(COG0151)	AdoMet_dc	(pfam02675)	Arginase	(pfam00491)
Bacteria Dictyoglomi Dictyoglomales Dictyoglomaceae Dictyoglomus thermophilum H-6-12	Dth-1-1	NC_011297.1	-	1257862	1257774	Adenylsuccinate lyase 1	(cd01360)	PurS	(pfam02700)	GATase1_FGAR_AT	(cd01740)	PurL_repeat1	(cd02203)	PurL_repeat2	(cd02204)	GPATase N	(cd00715)	PurM	(cd02196)	PurN	(COG0299)	PurD	(COG0151)	AdoMet_dc	(pfam02675)	Arginase	(pfam00491)

## Sheet: Agmatinase by Gdn_riboswitch
Taxonomy of species	Abbrev. of hits	Seq. accession	DNA strand	5' at	3' at	Gene	Conservet domain	Gene	Conservet domain	Gene	Conservet domain	Gene	Conservet domain	Gene	Conservet domain	Gene	Conservet domain	Gene	Conservet domain	Gene	Conservet domain	Gene	Conservet domain	Gene	Conservet domain	Gene	Conservet domain
Bacteria Actinobacteria Actinobacteridae Actinomycetales Micromonosporineae Micromonosporaceae Actinoplanes friuliensis DSM 7358	Afr-1-1	NC_022657.1	-	7558152	7558053	Arginase	(pfam00491)	Arginase	(pfam00491)	SsuA_fam	(TIGR01728)	TM_PBP2	(cd06261)	ABC_NrtD_SsuB_transporters	(cd03293)
Bacteria Cyanobacteria Chroococcales Cyanobium sp. PCC 7001	Csp-2-1	NZ_DS990556.1	-	259768	259647	Arginase	(pfam00491)	HypA	(pfam01155)	hypB	(TIGR00073)	gln_synth III	(TIGR03105)
Bacteria Cyanobacteria Chroococcales Cyanothece sp. PCC 7822	Csp-4-1	NC_014501.1	+	2260736	2260866	Arginase	(pfam00491)	hypA	(TIGR00100)	hypB	(TIGR00073)
Bacteria Cyanobacteria Chroococcales Microcystis aeruginosa NIES-843	Mae-1-1	NC_010296.1	+	1688369	1688503	Arginase	(pfam00491)	hypo	hypA	(TIGR00100)	hypB	(TIGR00073)
Bacteria Cyanobacteria Chroococcales Synechococcus sp. CB0205	Ssp-1-1	NZ_ADXM01000056.1	+	14396	14494	Arginase	(pfam00491)	HypA	(pfam01155)	hypB	(TIGR00073)	gln_synth III	(TIGR03105)	SsuA_fam	(TIGR01728)	TM_PBP2	(cd06261)	ABC_NrtD_SsuB_transporters	(cd03293)
Bacteria Cyanobacteria Chroococcales Synechococcus sp. CC9605	Ssp-2-1	NC_007516.1	-	1021660	1021560	Arginase	(pfam00491)	HypA	(pfam01155)	hypB	(TIGR00073)	SsuA_fam	(TIGR01728)	TM_PBP2	(cd06261)	ABC_NrtD_SsuB_transporters	(cd03293)	Rieske_RO_Alpha N	(cd03469)	RHO_alpha_C	(cd00680)
Bacteria Cyanobacteria Chroococcales Synechococcus sp. WH 5701	Ssp-3-1	NZ_CH724160.1	+	628091	628212	Arginase	(pfam00491)	HypA	(pfam01155)	hypB	(TIGR00073)	gln_synth III	(TIGR03105)	SsuA_fam	(TIGR01728)	TM_PBP2	(cd06261)	ABC_NrtD_SsuB_transporters	(cd03293)	Rieske_RO_Alpha N	(cd03469)	RHO_alpha_C	(cd00680)
Bacteria Cyanobacteria Chroococcales Synechococcus sp. WH 8102	Ssp-4-1	NC_005070.1	+	1383854	1383952	Arginase	(pfam00491)	HypA	(pfam01155)	hypB	(TIGR00073)	SsuA_fam	(TIGR01728)	TM_PBP2	(cd06261)	ABC_NrtD_SsuB_transporters	(cd03293)	Rieske_RO_Alpha N	(cd03469)	RHO_alpha_C	(cd00680)
Bacteria Cyanobacteria Chroococcales Synechocystis sp. PCC 6803	Ssp-5-1	NC_017277.1	-	801401	801280	Arginase	(pfam00491)	hypA	(TIGR00100)	hypB	(cd00882)	SsuA_fam	(TIGR01728)	TM_PBP2	(cd06261)	ABC_NrtD_SsuB_transporters	(cd03293)
Bacteria Cyanobacteria Chroococcales Synechocystis sp. PCC 6803	Ssp-5-3	NC_020286.1	-	801056	800935	Arginase	(pfam00491)	hypA	(TIGR00100)	hypB	(cd00882)	SsuA_fam	(TIGR01728)	TM_PBP3	(cd06261)	ABC_NrtD_SsuB_transporters	(cd03293)
Bacteria Cyanobacteria Chroococcales Synechocystis sp. PCC 6803	Ssp-5-2	NC_000911.1	-	801401	801280	Arginase	(pfam00491)	hypA	(TIGR00100)	hypB	(cd00882)	SsuA_fam	(TIGR01728)	TM_PBP4	(cd06261)	ABC_NrtD_SsuB_transporters	(cd03293)
Bacteria Cyanobacteria Chroococcales Synechocystis sp. PCC 6803 substr. GT-I	Ssp-6-1	NC_017038.1	-	801503	801382	Arginase	(pfam00491)	hypA	(TIGR00100)	hypB	(cd00882)	SsuA_fam	(TIGR01728)	TM_PBP5	(cd06261)	ABC_NrtD_SsuB_transporters	(cd03293)
Bacteria Cyanobacteria Chroococcales Synechocystis sp. PCC 6803 substr. PCC-N	Ssp-7-1	NC_017052.1	-	801644	801523	Arginase	(pfam00491)	hypA	(TIGR00100)	hypB	(cd00882)	SsuA_fam	(TIGR01728)	TM_PBP6	(cd06261)	ABC_NrtD_SsuB_transporters	(cd03293)
Bacteria Cyanobacteria Chroococcales Synechocystis sp. PCC 6803 substr. PCC-P	Ssp-8-1	NC_17039.1	-	801656	801535	Arginase	(pfam00491)	hypA	(TIGR00100)	hypB	(cd00882)	SsuA_fam	(TIGR01728)	TM_PBP7	(cd06261)	ABC_NrtD_SsuB_transporters	(cd03293)
Bacteria Cyanobacteria cyanobacterium PCC 7702	cPC-1-1	NZ_KB235926.1	-	341731	341618	Arginase	(pfam00491)	HypA	(pfam01155)	hypB	(TIGR00073)	SsuA_fam	(TIGR01728)	TM_PBP2	(cd06261)	ABC_NrtD_SsuB_transporters	(cd03293)
Bacteria Cyanobacteria Nostocales Nostocaceae Cylindrospermopsis raciborskii CS-505	Cra-1-1	NZ_ACYA01000047.1	-	176949	176831	Arginase	(pfam00491)	hypA	(TIGR00100)	hypB	(TIGR00073)	SsuA_fam	(TIGR01728)	TM_PBP2	(cd06261)	ABC_NrtD_SsuB_transporters	(cd03293)
Bacteria Cyanobacteria Oscillatoriales Arthrospira sp. PCC 8005	Asp-3-1	NZ_CAFN01000002.1	-	9995	9847	Arginase	(pfam00491)	hypA	(TIGR00100)	hypB	(TIGR00073)	SsuA_fam	(TIGR01728)	TM_PBP2	(cd06261)	ABC_NrtD_SsuB_transporters	(cd03293)
Bacteria Cyanobacteria Oscillatoriales Microcoleus chthonoplastes PCC 7420	Mch-1-1	NZ_DS989861.1	-	123884	123742	Arginase	(pfam00491)	HypA	(pfam01155)	hypB	(TIGR00073)
Bacteria Cyanobacteria Oscillatoriophycideae Chroococcales Cyanobacterium aponinum PCC 10605	Cap-1-1	NC_019776.1	-	3816086	3815958	Arginase	(pfam00491)	hypA	(TIGR00100)	hypB	(TIGR00073)	SsuA_fam	(TIGR01728)	TM_PBP2	(cd06261)	ABC_NrtD_SsuB_transporters	(cd03293)
Bacteria Cyanobacteria Oscillatoriophycideae Chroococcales Cyanobacterium stanieri PCC 7202	Cst-1-1	NC_019778.1	-	1401039	1400903	Arginase	(pfam00491)	HypA	(pfam01155)	hypB	(TIGR00073)
Bacteria Cyanobacteria Oscillatoriophycideae Chroococcales Cyanobium gracile PCC 6307	Cgr-1-1	NC_019675.1	+	985788	985932	Arginase	(pfam00491)	HypA	(pfam01155)	hypB	(TIGR00073)	gln_synth III	(TIGR03105)	SsuA_fam	(TIGR01728)	TM_PBP2	(cd06261)	ABC_NrtD_SsuB_transporters	(cd03293)	Rieske_RO_Alpha N	(cd03469)	RHO_alpha_C	(cd00680)
Bacteria Cyanobacteria Oscillatoriophycideae Chroococcales Dactylococcopsis salina PCC 8305	Dsa-1-1	NC 019780.1	-	3663911	3663774	Arginase	(pfam00491)	HypA	(pfam01155)			SsuA_fam	(TIGR01728)	TM_PBP2	(cd06261)	ABC_NrtD_SsuB_transporters	(cd03293)
Bacteria Cyanobacteria Oscillatoriophycideae Chroococcales Gloeocapsa sp. PCC 73106	Gsp-1-1	NZ_ALVY01000224.1	+	65801	65894	Arginase	(pfam00491)	HypA	(pfam01155)	hypB	(TIGR00073)	SsuA_fam	(TIGR01728)	TM_PBP2	(cd06261)	ABC_NrtD_SsuB_transporters	(cd03293)
Bacteria Cyanobacteria Oscillatoriophycideae Chroococcales Halothece cluster Halothece sp. PCC 7418	Hsp-1-1	NC_019779.1	-	2128785	2128676	Arginase	(pfam00491)	hypA	(TIGR00100)	hypB	(TIGR00073)	SsuA_fam	(TIGR01728)	TM_PBP2	(cd06261)	ABC_NrtD_SsuB_transporters	(cd03293)	Rieske_RO_Alpha N	(cd03469)	RHO_alpha_C	(cd00680)
Bacteria Cyanobacteria Oscillatoriophycideae Chroococcales Microcystis aeruginosa DIANCHI905	Mae-2-1	NZ_AOCI01000182.1	-	4576	4443	Arginase	(pfam00491)	hypA	(TIGR00100)	hypB	(TIGR00073)
Bacteria Cyanobacteria Oscillatoriophycideae Chroococcales Microcystis aeruginosa PCC 7941	Mae-3-1	NZ_HE973167.1	-	194353	194219	Arginase	(pfam00491)	hypA	(TIGR00100)	hypB	(TIGR00073)	SsuA_fam	(TIGR01728)	TM_PBP2	(cd06261)	ABC_NrtD_SsuB_transporters	(cd03293)
Bacteria Cyanobacteria Oscillatoriophycideae Chroococcales Microcystis aeruginosa PCC 9432	Mae-4-1	NZ_HE972589.1	+	67716	67850	Arginase	(pfam00491)	hypA	(TIGR00100)	hypB	(TIGR00073)	SsuA_fam	(TIGR01728)	TM_PBP2	(cd06261)	ABC_NrtD_SsuB_transporters	(cd03293)
Bacteria Cyanobacteria Oscillatoriophycideae Chroococcales Microcystis aeruginosa PCC 9717	Mae-5-1	NZ_HE972725.1	+	11309	11443	Arginase	(pfam00491)	hypA	(TIGR00100)	hypB	(TIGR00073)	SsuA_fam	(TIGR01728)	TM_PBP2	(cd06261)	ABC_NrtD_SsuB_transporters	(cd03293)
Bacteria Cyanobacteria Oscillatoriophycideae Chroococcales Microcystis aeruginosa PCC 9806	Mae-6-1	NZ_HE973252.1	-	22776	22642	Arginase	(pfam00491)	hypA	(TIGR00100)	hypB	(TIGR00073)	SsuA_fam	(TIGR01728)	TM_PBP2	(cd06261)	ABC_NrtD_SsuB_transporters	(cd03293)
Bacteria Cyanobacteria Oscillatoriophycideae Chroococcales Microcystis aeruginosa PCC 9807	Mae-7-1	NZ_HE973364.1	+	26691	26824	Arginase	(pfam00491)	hypA	(TIGR00100)	hypB	(TIGR00073)	SsuA_fam	(TIGR01728)	TM_PBP2	(cd06261)	ABC_NrtD_SsuB_transporters	(cd03293)
Bacteria Cyanobacteria Oscillatoriophycideae Chroococcales Microcystis aeruginosa PCC 9809	Mae-9-1	NZ_HE973766.1	+	26033	26167	Arginase	(pfam00491)	hypA	(TIGR00100)	hypB	(TIGR00073)	SsuA_fam	(TIGR01728)	TM_PBP2	(cd06261)	ABC_NrtD_SsuB_transporters	(cd03293)
Bacteria Cyanobacteria Oscillatoriophycideae Chroococcales Microcystis aeruginosa SPC777	Mae-10-1	NZ_ASZQ01000152.1	-	21577	21443	Arginase	(pfam00491)	hypA	(TIGR00100)	hypB	(TIGR00073)	SsuA_fam	(TIGR01728)	TM_PBP2	(cd06261)	ABC_NrtD_SsuB_transporters	(cd03293)
Bacteria Cyanobacteria Oscillatoriophycideae Chroococcales Synechococcus sp. PCC 7336	Ssp-9-1	NZ_CM001776.1	+	1949234	1949338	Arginase	(pfam00491)	HypA	(pfam01155)	hypB	(TIGR00073)	SsuA_fam	(TIGR01728)	TM_PBP2	(cd06261)	ABC_NrtD_SsuB_transporters	(cd03293)
Bacteria Cyanobacteria Oscillatoriophycideae Chroococcales Synechocystis sp. PCC 7509	Ssp-11-1	NZ_ALVU01000157.1	-	24071	23946	Arginase	(pfam00491)	hypA	(TIGR00100)	hypB	(TIGR00073)	SsuA_fam	(TIGR01728)	TM_PBP2	(cd06261)	ABC_NrtD_SsuB_transporters	(cd03293)	AhpC/TSA
Bacteria Cyanobacteria Oscillatoriophycideae Oscillatoriales cyanobacterium JSC-12	Ocy-1-1	NZ_CM001633.1	+	1425799	1425911	Arginase	(pfam00491)	HypA	(pfam01155)	hypB	(TIGR00073)	SsuA_fam	(TIGR01728)	TM_PBP2	(cd06261)	ABC_NrtD_SsuB_transporters	(cd03293)	NTP pyrophosphohydrolase
Bacteria Cyanobacteria Oscillatoriophycideae Oscillatoriales Geitlerinema sp. PCC 7407	Gsp-4-1	NC_019703.1	-	2860848	2860718	Arginase	(pfam00491)	HypA	(pfam01155)	hypB	(TIGR00073)
Bacteria Cyanobacteria Oscillatoriophycideae Oscillatoriales Oscillatoria acuminata PCC 6304	Oac-1-1	NC_019693.1	-	57118	56984	Arginase	(pfam00491)	hypA	(TIGR00100)	hypB	(TIGR00073)	SsuA_fam	(TIGR01728)	TM_PBP2	(cd06261)	ABC_NrtD_SsuB_transporters	(cd03293)
Bacteria Cyanobacteria Pleurocapsales Chroococcidiopsis thermalis PCC 7203	Cth-1-1	NC_019695.1	+	1896963	1897120	Arginase	(pfam00491)	hypA	(TIGR00100)	hypB	(TIGR00073)	SsuA_fam	(TIGR01728)	TM_PBP2	(cd06261)	ABC_NrtD_SsuB_transporters	(cd03293)
Bacteria Cyanobacteria Pleurocapsales Pleurocapsa sp. PCC 7319	Psp-2-1	NZ_KB235922.1	+	599225	599367	Arginase	(pfam00491)	hypA	(TIGR00100)	hypB	(TIGR00073)	SsuA_fam	(TIGR01728)	TM_PBP2	(cd06261)	ABC_NrtD_SsuB_transporters	(cd03293)
Bacteria Cyanobacteria Pleurocapsales Stanieria cyanosphaera PCC 7437	Scy-1-1	NC_019748.1	-	1114454	1114310	Arginase	(pfam00491)	hypA	(TIGR00100)	hypB	(TIGR00073)	SsuA_fam	(TIGR01728)	TM_PBP2	(cd06261)	ABC_NrtD_SsuB_transporters	(cd03293)
Bacteria Cyanobacteria Pleurocapsales Xenococcus sp. PCC 7305	Xsp-1-1	NZ_ALVZ01000176.1	+	32125	32266	Arginase	(pfam00491)	GST	hypA	(TIGR00100)	hypB	(TIGR00073)	sodium:solute symporter
Bacteria Cyanobacteria Stigonematales Chlorogloeopsis fritschii PCC 6912	Cfr-1-1	NZ_AJLN01000037.1	-	13655	13543	Arginase	(pfam00491)	hypA	(TIGR00100)	hypB	(TIGR00073)
Bacteria Cyanobacteria Stigonematales Fischerella muscicola PCC 7414	Fmu-1-1	NZ_AJLK01000027.1	-	5793	5683	Arginase	(pfam00491)	thioredoxin
Bacteria Cyanobacteria Stigonematales Fischerella muscicola SAG 1427-1 = PCC 73103	Fmu-2-1	NZ_AJLJ01000064.1	+	57356	57468	Arginase	(pfam00491)	hypA	(TIGR00100)	hypB	(TIGR00073)	OmpA	SsuA_fam	(TIGR01728)	TM_PBP2	(cd06261)	ABC_NrtD_SsuB_transporters	(cd03293)	thioredoxin
Bacteria Cyanobacteria Stigonematales Fischerella sp. JSC-11	Fsp-2-1	NZ_AGIZ01000008.1	-	1762	1652	Arginase	(pfam00491)
Bacteria Cyanobacteria Stigonematales Fischerella thermalis PCC 7521	Fth-1-1	NZ_AJLL01000013.1	+	17034	17144	Arginase	(pfam00491)
Bacteria Firmicutes Bacillales Alicyclobacillaceae Bacillus tusciae DSM 2912	Btu-1-1	NC_014098.1	-	2032540	2032430	Arginase	(pfam00491)
Bacteria Proteobacteria Alphaproteobacteria Rhizobiales Bradyrhizobiaceae Bradyrhizobium sp. STM 3843	Bsp-26-1	NZ_CAFK01000283.1	+	19876	19982	ABC_peri_uca	(TIGR03427)	TM_PBP2	(cd06261)	ABC_NrtD_SsuB_transporters	(cd03293)	Arginase	(pfam00491)
Bacteria Proteobacteria Alphaproteobacteria Rhizobiales Phyllobacteriaceae Hoe ea phototrophica DFL-43	Hph-1-1	NZ_DS544889.1	+	2338458	2338570	ABC_peri_uca	(TIGR03427)	TM_PBP2	(cd06261)	ABC_NrtD_SsuB_transporters	(cd03293)	Arginase	(pfam00491)
Bacteria Proteobacteria Alphaproteobacteria Rhizobiales Phyllobacteriaceae Mesorhizobium alhagi CCNWXJ12-2	Mal-1-1	NZ_AHAM01000344.1	-	5571	5457	ABC_peri_uca	(TIGR03427)	TauC	(COG0600)	ABC_NrtD_SsuB_transporters	(cd03293)	Arginase	(pfam00491)
Bacteria Proteobacteria Alphaproteobacteria Rhizobiales Phyllobacteriaceae Mesorhizobium amorphae CCNWGS0123	Mam-1-1	NZ_AGSN01000157.1	-	7758	7643	ABC_peri_uca	(TIGR03427)	TM_PBP2	(cd06261)	ABC_NrtD_SsuB_transporters	(cd03293)	Arginase	(pfam00491)	hypo	HupE/UreJ	(pfam04955)
Bacteria Proteobacteria Alphaproteobacteria Rhizobiales Phyllobacteriaceae Mesorhizobium sp. LSJC280B00	Msp-5-1	NZ_AYVL01000027.1	-	59321	59206	ABC_peri_uca	(TIGR03427)	TauC	(COG0600)	ABC_NrtD_SsuB_transporters	(cd03293)	Arginase	(pfam00491)	hypo	HupE/UreJ	(pfam04955)
Bacteria Proteobacteria Alphaproteobacteria Rhizobiales Rhizobiaceae Rhizobium/Agrobacterium group Rhizobium sp. NGR234	Rsp-6-1	NC_012586.1	-	394021	393914	ABC_peri_uca	(TIGR03427)	TM_PBP2	(cd06261)	ABC_NrtD_SsuB_transporters	(cd03293)	Arginase	(pfam00491)	hypo	HupE/UreJ	(pfam04955)
Bacteria Proteobacteria Alphaproteobacteria Rhizobiales Rhizobiaceae Sinorhizobium/Ensifer group Sinorhizobium fredii USDA 257	Sfr-1-1	NC_018000.1	-	2877619	2877512	ABC_peri_uca	(TIGR03427)	TM_PBP2	(cd06261)	ABC_NrtD_SsuB_transporters	(cd03293)	Arginase	(pfam00491)	hypo	HupE/UreJ	(pfam04955)
Bacteria Proteobacteria Alphaproteobacteria Rhizobiales Xanthobacteraceae Starkeya novella DSM 506	Sno-1-1	NC_014217.1	-	87994	87894	Arginase	(pfam00491)
Bacteria Proteobacteria Alphaproteobacteria Rhizobiales Xanthobacteraceae unclassi ed Xanthobacteraceae Xanthobacteraceae bacterium 501b	Xba-1-1	NZ_KB899087.1	+	3294888	3295003	Arginase	(pfam00491)
Bacteria Proteobacteria Alphaproteobacteria Rhodobacterales bacterium HTCC2654	Rba-1-1	NZ_CH902578.1	-	1602858	1602749	ABC_peri_uca	(TIGR03427)	TM_PBP2	(cd06261)	ABC_NrtD_SsuB_transporters	(cd03293)	Arginase	(pfam00491)	DUF2236	(pfam09995)
Bacteria Proteobacteria Alphaproteobacteria Rhodobacterales Rhodobacteraceae Loktanella cinnabarina LL-001	Lci-1-1	NZ_BATB01000019.1	+	20174	20277	ABC_peri_uca	(TIGR03427)	TM_PBP2	(cd06261)	ABC_NrtD_SsuB_transporters	(cd03293)	Arginase	(pfam00491)
Bacteria Proteobacteria Alphaproteobacteria Rhodobacterales Rhodobacteraceae Sagittula stellata E-37	Sst-1-1	NZ_AAYA01000003.1	+	309765	309872	ABC_peri_uca	(TIGR03427)	TM_PBP2	(cd06261)	ABC_NrtD_SsuB_transporters	(cd03293)	Arginase	(pfam00491)
environmental samples	env-1	JCVI_SCAF_1096627208816	-	836	736	Arginase	(pfam00491)
environmental samples	env-23	2013519757	-	3387	3260	Arginase	(pfam00491)
environmental samples	env-71	SL_1KL_011_SED_10003896	-	2271	2157	Arginase	(pfam00491)	hypA	(TIGR00100)	hypB	(TIGR00073)
environmental samples	env-72	SL_5KL_010_SED_10001714	-	982	868	Arginase	(pfam00491)
environmental samples	env-75	SL_1KL_011_SED_10008350	+	4825	4939	Arginase	(pfam00491)
environmental samples	env-82	3300000053_067336	+	242	349	SsuA_fam	(TIGR01728)	TM_PBP2	(cd06261)	ABC_NrtD_SsuB_transporters	(cd03293)	Arginase	(pfam00491)	CbiM	(pfam01891)	PRK06287	(PRK06287)
environmental samples	env-303	JCVI_SCAF_1096628382219	-	852	757	Arginase	(pfam00491)
environmental samples	env-304	JCVI_SCAF_1096627201552	+	5869	5967	Arginase	(pfam00491)
environmental samples	env-306	JCVI_SCAF_1096628067080	-	1528	1430	Arginase	(pfam00491)	Rieske_RO_Alpha N	(cd03469)	RHO_alpha_C	(cd00680)
environmental samples	env-309	JCVI_SCAF_1096627962308	+	433	533	Arginase	(pfam00491)
environmental samples	env-310	JCVI_SCAF_1096627059263	+	391	491	Arginase	(pfam00491)	HypA	(pfam01155)
environmental samples	env-313	JCVI_SCAF_1096627158018	+	528	628	Arginase	(pfam00491)
environmental samples	env-350	JGI1357J11328_10004548	-	4616	4505	TM_PBP2	(cd06261)	ABC_peri_uca	(TIGR03427)	ABC_NrtD_SsuB_transporters	(cd03293)	Arginase	(pfam00491)
environmental samples	env-351	JGI1356J14229_10006404	+	3811	3922	ABC_peri_uca	(TIGR03427)	TM_PBP2	(cd06261)	ABC NrtD SsuB transporters	(cd03293)	Arginase	(pfam00491)
environmental samples	env-798	SL_9KL_010_SED_10083386	-	992	897	Arginase	(pfam00491)
environmental samples	env-799	SL_9KL_010_SED_10003669	-	3897	3788	Arginase	(pfam00491)	hypA	(TIGR00100)	hypB	(TIGR00073)
environmental samples	env-802	ElkS_mat_CD2A_1005238	+	1831	1973	hypo	hypo	Arginase	(pfam00491)
ykkc-variant
Bacteria Cyanobacteria Chroococcales Synechococcus sp. RCC307	Ssp-3-1	NC_009482.1	-	2165475	2165375	Arginase	(pfam00491)	HypA	(pfam01155)	hypB	(TIGR00073)	SsuA_fam	(TIGR01728)	TM_PBP2	(cd06261)	ABC_NrtD_SsuB_transporters	(cd03293)	Rieske_RO_Alpha N	(cd03469)	RHO_alpha_C	(cd00680)
Bacteria Dictyoglomi Dictyoglomales Dictyoglomaceae Dictyoglomus thermophilum H-6-12	Dth-1-1	NC_011297.1	-	1257862	1257774	Adenylsuccinate lyase 1	(cd01360)	PurS	(pfam02700)	GATase1_FGAR_AT	(cd01740)	PurL_repeat1	(cd02203)	PurL_repeat2	(cd02204)	GPATase N	(cd00715)	PurM	(cd02196)	PurN	(COG0299)	PurD	(COG0151)	AdoMet_dc	(pfam02675)	Arginase	(pfam00491)
Bacteria Dictyoglomi Dictyoglomales Dictyoglomaceae Dictyoglomus turgidum DSM 6724	Dtu-1-1	NC_011661.1	-	1438134	1438047	Adenylsuccinate lyase 1	(cd01360)	PurS	(pfam02700)	GATase1_FGAR_AT	(cd01740)	PurL_repeat1	(cd02203)	PurL_repeat2	(cd02204)	GPATase N	(cd00715)	PurM	(cd02196)	PurN	(COG0299)	PurD	(COG0151)	AdoMet_dc	(pfam02675)	Arginase	(pfam00491)
